# Supplementary figures and images for: Cohort Profile: A Prospective Study of Gut Microbiota in Patients with Acute Ischemic Stroke
Source: Hindawi journal article supplement (doi:10.1155/2023/3944457), 2023-01-04

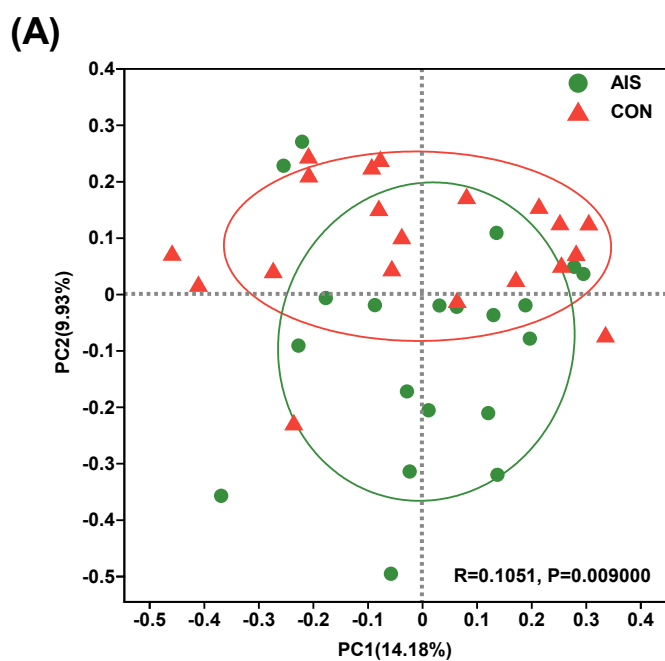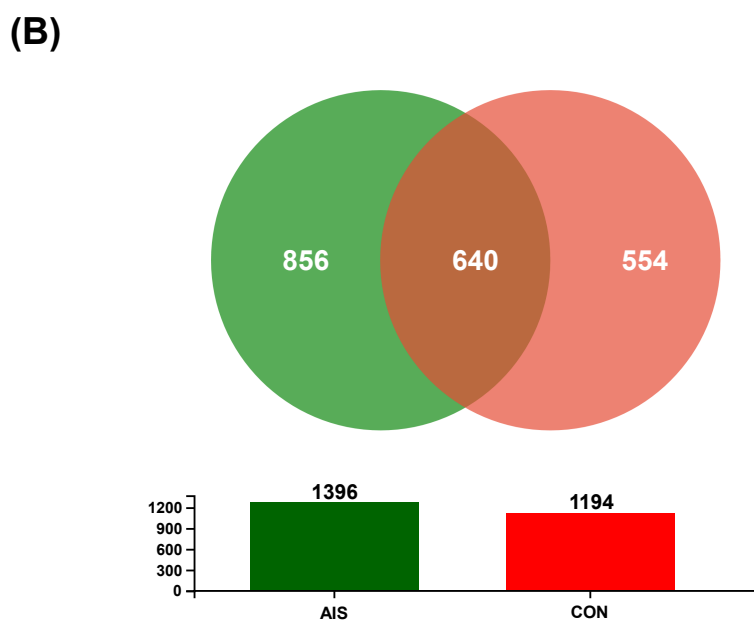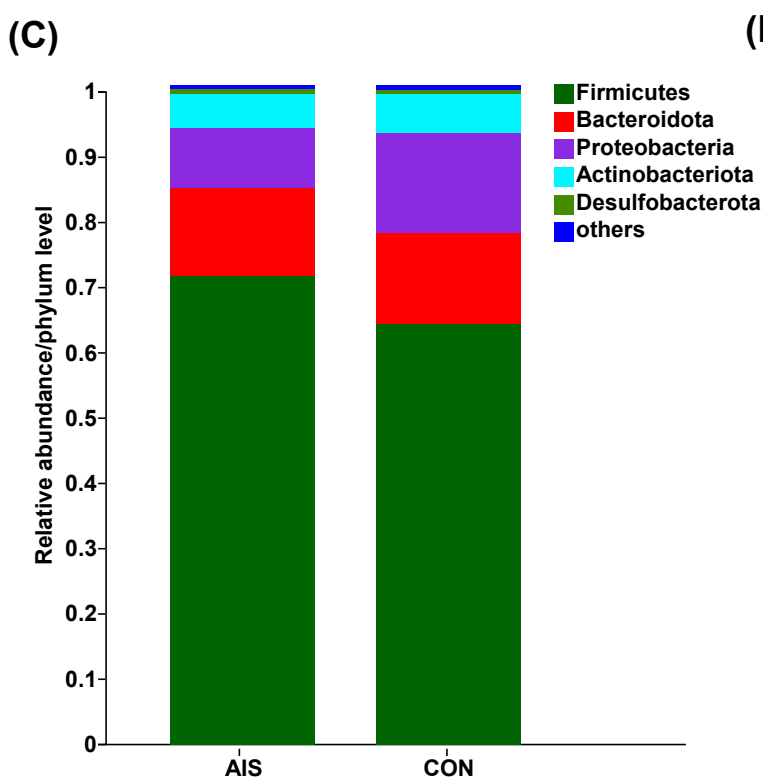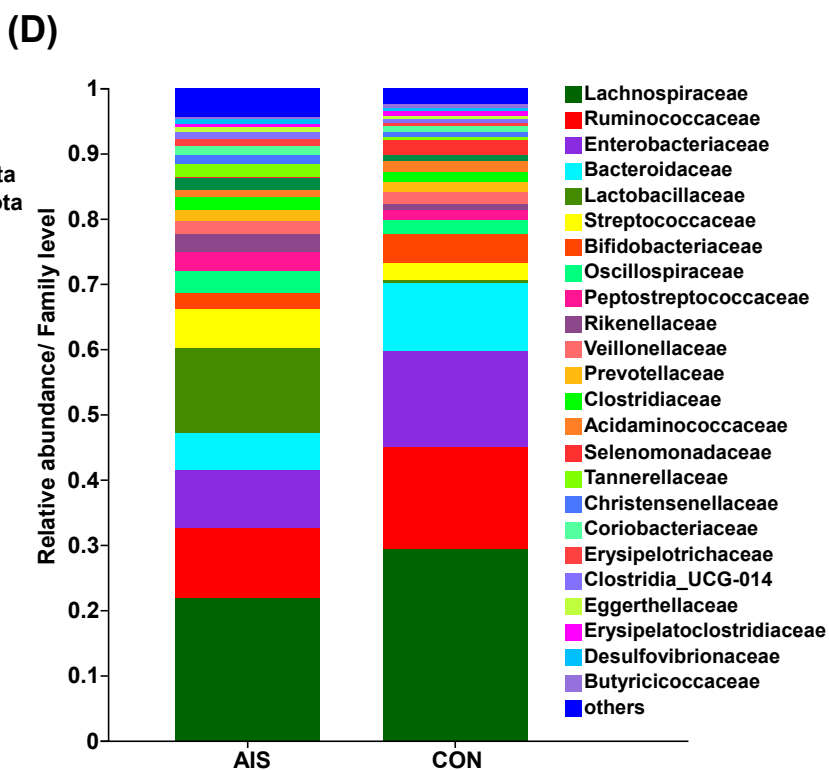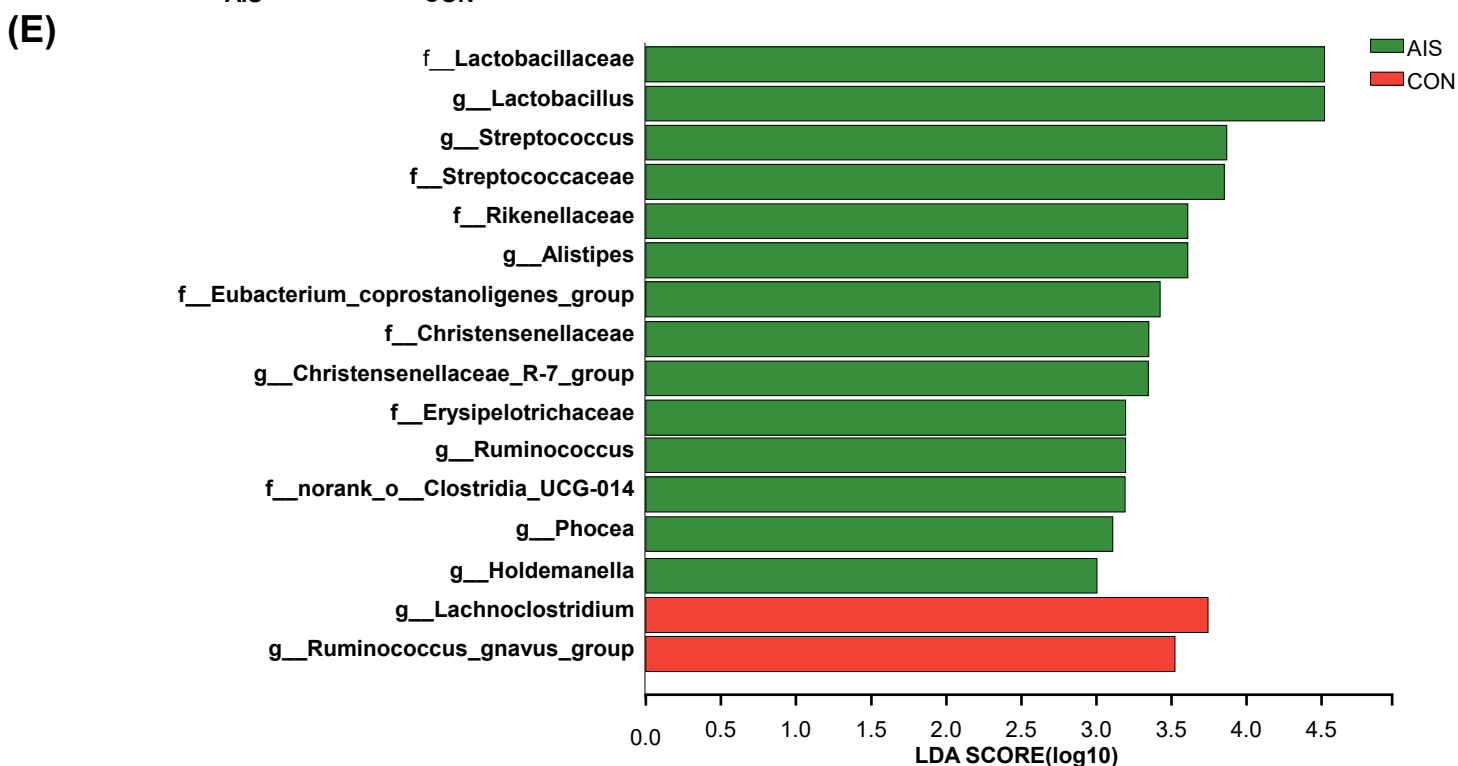

Supplement: f1 [file 3944457.f1.pdf]
